# Supplementary material
Source: PubMed Central journal article supplement (PMC2682776)
Supplement: NIHMS4422-supplement-1.pdf [file NIHMS4422-supplement-1.pdf]

**Supplementary Figure S2** – *Clinical associations of HGF and Met expression in favourable histology Wilms tumours.* Kaplan-Meier curves and associated p values (logrank test) for overall and relapse-free survival for HGF and/or Met expression in favourable histology Wilms tumours on a tissue microarray.

# Supplementary Figure S2

## Relapse-free survival

## Overall survival

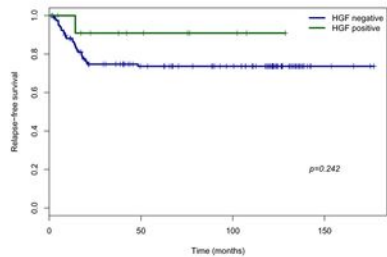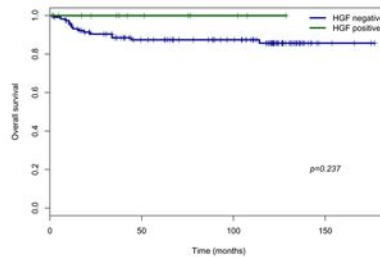

HGF

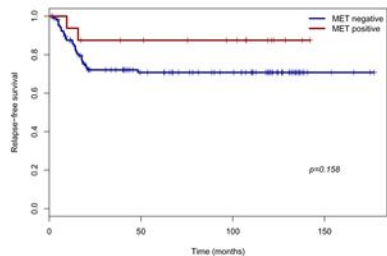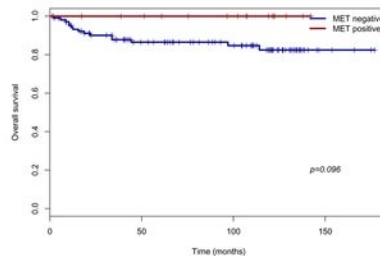

MET

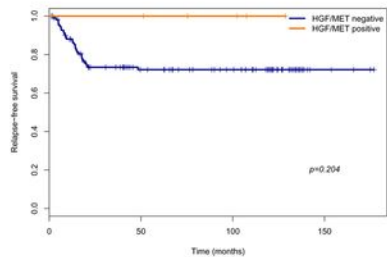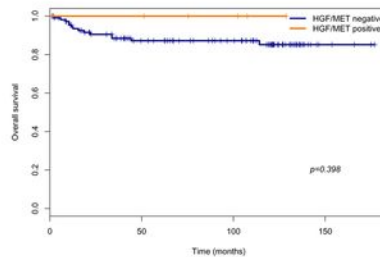

HGF/MET  
coexpression

**Supplementary Table S1** – *Clinical correlations for HGF and MET expression in favourable histology Wilms tumours.* Wilms tumour cases from the tissue microarray are stratified according to cellular component, with p values are calculated for relapse-free (RFS) and overall survival (OS) (logrank test).

|               | <i>HGF</i>      |            |           | <i>MET</i>      |            |           | <i>HGF/MET coexpression</i> |            |           |
|---------------|-----------------|------------|-----------|-----------------|------------|-----------|-----------------------------|------------|-----------|
|               | <i>Positive</i> | <i>RFS</i> | <i>OS</i> | <i>Positive</i> | <i>RFS</i> | <i>OS</i> | <i>Positive</i>             | <i>RFS</i> | <i>OS</i> |
| WT blastemal  | 3/101 (3%)      | p=0.414    | p=0.582   | 3/98 (3%)       | p=0.463    | p=0.282   | 2/98 (2%)                   | p=0.427    | p=0.661   |
| WT epithelial | 7/80 (9%)       | p=0.259    | p=0.446   | 8/81 (10%)      | p=0.196    | p=0.371   | 3/77 (4%)                   | p=0.194    | p=0.304   |
| WT stromal    | 6/92 (7%)       | p=0.853    | p=0.533   | 10/85 (12%)     | p=0.631    | p=0.471   | 4/83 (5%)                   | p=0.059    | NA        |
| WT any        | 15/193 (8%)     | p=0.242    | p=0.237   | 25/179(14%)     | p=0.158    | p=0.096   | 6/171 (4%)                  | p=0.204    | p=0.398   |
